# Supplementary material for: WITMSG: Large-scale Prediction of Human Intronic m6A RNA Methylation Sites from Sequence and Genomic Features
Source: PubMed Central journal article supplement — Curr Genomics. 2020 Jan;21(1):67–76. doi: 10.2174/1389202921666200211104140 (PMC7324894; doi:10.2174/1389202921666200211104140), 2020-01
Supplement: CG-21-67_SD1.pdf [file CG-21-67_SD1.pdf]

## Supplementary Material

WITMSG: Large-scale Prediction of Human Intronic m<sup>6</sup>A RNA Methylation Sites from Sequence and Genomic FeaturesLian Liu<sup>1</sup>, Xiujuan Lei<sup>1,\*</sup>, Jia Meng<sup>2</sup> and Zhen Wei<sup>2,\*</sup><sup>1</sup>School of Computer Sciences, Shannxi Normal University, Xi'an, Shaanxi, 710119, China; <sup>2</sup>Department of Biological Sciences, Xi'an Jiaotong-Liverpool University, Suzhou, Jiangsu, 215123, China

Table S1 Genomic features considered in WITMSG

| ID | Name                | Description                                                                  | Note                                        |
|----|---------------------|------------------------------------------------------------------------------|---------------------------------------------|
| 1  | Stop_codons         | stop codons 203bp                                                            | whether the site is overlapped to the       |
| 2  | Start_codons        | start codons 203bp                                                           | topological region on                       |
| 3  | TSS                 | downstream 100bp of transcription start site                                 | the major RNA transcript.                   |
| 4  | exon_stop           | exon with stop codon                                                         |                                             |
| 5  | length_gene_ex      | mature transcript length                                                     | The region length in bp.                    |
| 6  | length_gene_full    | full transcript length                                                       |                                             |
| 7  | AAACA               | motif --- AAACA                                                              |                                             |
| 8  | AGACA               | motif --- AGACA                                                              |                                             |
| 9  | AAACT               | motif --- AAACT                                                              |                                             |
| 10 | AGACT               | motif --- AGACT                                                              |                                             |
| 11 | AAACC               | motif --- AAACC                                                              |                                             |
| 12 | AGACC               | motif --- AGACC                                                              |                                             |
| 13 | GAACA               | motif --- GAACA                                                              |                                             |
| 14 | GGACA               | motif --- GGACA                                                              |                                             |
| 15 | GAACT               | motif --- GAACT                                                              |                                             |
| 16 | GGAAT               | motif --- GGAAT                                                              |                                             |
| 17 | GAACC               | motif --- GAACC                                                              |                                             |
| 18 | GGACC               | motif --- GGACC                                                              |                                             |
| 19 | TAACA               | motif --- TAACA                                                              |                                             |
| 20 | TGACA               | motif --- TGACA                                                              |                                             |
| 21 | TAACT               | motif --- TAACT                                                              |                                             |
| 22 | TGACT               | motif --- TGACT                                                              |                                             |
| 23 | TAACC               | motif --- TAACC                                                              |                                             |
| 24 | TGACC               | motif --- TGACC                                                              |                                             |
| 25 | dist_sj_5_p2000     | distance to the upstream (5' end) splicing junction                          |                                             |
| 26 | dist_sj_3_p2000     | distance to the downstream (3' end) splicing junction                        |                                             |
| 27 | dist_nearest_p2000  | distance to the nearest neighbors (peaked at 2000bp)                         |                                             |
| 28 | dist_nearest_p200   | distance to the nearest neighbors (peaked at 200bp)                          |                                             |
| 29 | clust_f1000         | number of neighbors within 1000bp flanking regions                           |                                             |
| 30 | clust_f100          | number of neighbors within 100bp flanking regions                            |                                             |
| 31 | clust_DRACH_f1000   | number of DRACH motif neighbors within 1000bp flanking regions is generated. | clustering indicators and motif clustering  |
| 32 | clust_DRACH_f100    | number of DRACH motif neighbors within 100bp flanking regions is generated.  |                                             |
| 33 | dist_DRACH_p2000    | distance to the nearest DRACH motif (peaked at 2000bp)                       |                                             |
| 34 | dist_DRACH_p200     | distance to the nearest DRACH motif (peaked at 200bp)                        |                                             |
| 35 | PC_1bp              | phast cons scores 1bp                                                        |                                             |
| 36 | PC_101bp            | phast cons scores 101bp                                                      | Scores related to evolutionary conservation |
| 37 | FC_1bp              | fitness consequences scores 1bp z score                                      |                                             |
| 38 | FC_101bp            | fitness consequences scores 101bp z score                                    |                                             |
| 39 | struct_hybridize    | predicted hybridized region                                                  | RNA secondary structures                    |
| 40 | struct_loop         | inferred loop structures between hybridized region                           |                                             |
| 41 | HNRNPC_eCLIP        | eCLIP data of HNRNPC RNA binding sites                                       |                                             |
| 42 | YTHDC1_TREW         | TREW data of YTHDC1 RNA binding sites                                        |                                             |
| 43 | YTHDF1_TREW         | TREW data of YTHDF1 RNA binding sites                                        |                                             |
| 44 | YTHDF2_TREW         | TREW data of YTHDF2 RNA binding sites                                        |                                             |
| 45 | METTL3_TREW         | TREW data of METTL3 RNA binding sites                                        |                                             |
| 46 | METTL14_TREW        | TREW data of METTL14 RNA binding sites                                       |                                             |
| 47 | WTAP_TREW           | TREW data of WTAP RNA binding sites                                          |                                             |
| 48 | METTL16_CLIP        | CLIP data of METTL16 RNA binding sites                                       |                                             |
| 49 | FTO_CLIP            | CLIP data of FTO RNA binding sites                                           |                                             |
| 50 | FTO_eCLIP           | eCLIP data of FTO RNA binding sites                                          |                                             |
| 51 | TargetScan          | Predicted miRNA targeted sites by TargetScan                                 |                                             |
| 52 | Verified_miRtargets | miRNA targeted sites verified by experiment                                  |                                             |
| 53 | miR_targeted_genes  | miRNA targeted genes                                                         |                                             |
| 54 | HK_genes            | house keeping genes                                                          | Attributes of the genes or transcripts.     |
| 55 | isoform_num         | isoform number z score                                                       | Isoform number z score                      |
| 56 | GC_cont_101bp       | 101bp GC content z score                                                     |                                             |
| 57 | GC_cont_genes       | gene level GC content z score is generated.                                  | GC content z score                          |
